# Supplementary material
Source: MDPI journal article supplement (https://www.mdpi.com/2073-4441/15/10/1822)
Supplement: s1 [file s1]

SUPPLEMENTARY MATERIAL

**Table S1.** Operational expenses of all studied settings in EUR/m<sup>3</sup>, including cost estimation based on energy futures for 2024.

| Trial 1 (42h) | Citric | NaOCl | Energy2020 | Modules | Total | Total (Energy 2024) |
|---------------|--------|-------|------------|---------|-------|---------------------|
| Setting 1     | 0.014  | 0.010 | 0.005      | 0.012   | 0.041 | 0.045               |
| Setting 2     | 0.012  | 0.009 | 0.003      | 0.011   | 0.035 | 0.038               |
| Setting 3     | 0.014  | 0.010 | 0.004      | 0.012   | 0.041 | 0.045               |
| Setting 4     | 0.012  | 0.009 | 0.003      | 0.010   | 0.035 | 0.038               |
| Setting 5     | 0.009  | 0.007 | 0.004      | 0.008   | 0.027 | 0.031               |
| Setting 6     | 0.008  | 0.006 | 0.003      | 0.007   | 0.025 | 0.027               |
| Setting 7     | 0.009  | 0.007 | 0.004      | 0.008   | 0.027 | 0.030               |
| Setting 8     | 0.008  | 0.006 | 0.003      | 0.007   | 0.024 | 0.026               |
| Trial 2 (42h) | Citric | NaOCl | Energy2020 | Modules | Total | Total (Energy 2024) |
| Setting 1     | 0.015  | 0.011 | 0.005      | 0.013   | 0.044 | 0.049               |
| Setting 2     | 0.013  | 0.009 | 0.004      | 0.011   | 0.037 | 0.040               |
| Setting 3     | 0.015  | 0.011 | 0.005      | 0.013   | 0.043 | 0.048               |
| Setting 4     | 0.013  | 0.010 | 0.004      | 0.011   | 0.038 | 0.041               |
| Setting 5     | 0.011  | 0.008 | 0.005      | 0.010   | 0.034 | 0.038               |
| Setting 6     | 0.010  | 0.008 | 0.004      | 0.012   | 0.034 | 0.037               |
| Trial 1 (24h) | Citric | NaOCl | Energy2020 | Modules | Total | Total (Energy 2024) |
| Setting 1     | 0.024  | 0.017 | 0.005      | 0.012   | 0.058 | 0.062               |
| Setting 2     | 0.021  | 0.015 | 0.003      | 0.010   | 0.050 | 0.053               |
| Setting 3     | 0.024  | 0.018 | 0.004      | 0.012   | 0.058 | 0.062               |
| Setting 4     | 0.021  | 0.015 | 0.003      | 0.010   | 0.050 | 0.053               |
| Setting 5     | 0.015  | 0.011 | 0.004      | 0.007   | 0.037 | 0.041               |
| Setting 6     | 0.014  | 0.010 | 0.003      | 0.007   | 0.034 | 0.037               |
| Setting 7     | 0.015  | 0.011 | 0.004      | 0.007   | 0.037 | 0.040               |
| Trial 2 (24h) | Citric | NaOCl | Energy2020 | Modules | Total | Total (Energy 2024) |
| Setting 1     | 0.026  | 0.019 | 0.005      | 0.013   | 0.063 | 0.067               |
| Setting 2     | 0.022  | 0.016 | 0.004      | 0.011   | 0.053 | 0.056               |
| Setting 3     | 0.026  | 0.019 | 0.005      | 0.013   | 0.062 | 0.067               |
| Setting 4     | 0.023  | 0.016 | 0.004      | 0.011   | 0.053 | 0.057               |
| Setting 5     | 0.019  | 0.014 | 0.005      | 0.009   | 0.047 | 0.052               |
| Setting 6     | 0.018  | 0.013 | 0.003      | 0.009   | 0.043 | 0.046               |

**Table S2.** GHG emissions estimation for every operational setting (CO<sub>2</sub>-eq./m<sup>3</sup>).

| Trial 1 (42h) | Citric acid | NaOCl | Electricity | Modules | Wastewater treatment | Full NaOCl impact | Half NaOCl impact |
|---------------|-------------|-------|-------------|---------|----------------------|-------------------|-------------------|
|               |             |       |             |         |                      | Total             |                   |
| Setting 1     | 7.37        | 13.25 | 6.23        | 2.00    | 2.85                 | 31.71             | 25.08             |
| Setting 2     | 6.46        | 11.62 | 4.40        | 2.00    | 1.92                 | 26.40             | 20.59             |
| Setting 3     | 7.32        | 13.16 | 5.92        | 2.00    | 2.77                 | 31.17             | 24.59             |
| Setting 4     | 6.37        | 11.45 | 4.21        | 2.00    | 1.87                 | 25.90             | 20.17             |
| Setting 5     | 4.81        | 8.64  | 5.03        | 2.00    | 2.06                 | 22.54             | 18.22             |
| Setting 6     | 4.41        | 7.93  | 3.87        | 2.00    | 1.33                 | 19.54             | 15.57             |
| Setting 7     | 4.69        | 8.43  | 4.77        | 2.00    | 1.94                 | 21.82             | 17.61             |
| Setting 8     | 4.25        | 7.64  | 3.70        | 2.00    | 1.25                 | 18.84             | 15.02             |

  

| Trial 2 (42h) | Citric acid | NaOCl | Electricity | Modules | Wastewater treatment | Full NaOCl impact | Half NaOCl impact |
|---------------|-------------|-------|-------------|---------|----------------------|-------------------|-------------------|
|               |             |       |             |         |                      | Total             |                   |
| Setting 1     | 7.87        | 14.14 | 6.90        | 3.00    | 2.99                 | 34.90             | 27.83             |
| Setting 2     | 6.75        | 12.14 | 4.84        | 3.00    | 1.96                 | 28.68             | 22.62             |
| Setting 3     | 7.79        | 14.00 | 6.59        | 3.00    | 2.97                 | 34.35             | 27.35             |
| Setting 4     | 6.93        | 12.45 | 4.75        | 3.00    | 2.00                 | 29.13             | 22.91             |
| Setting 5     | 5.94        | 10.68 | 6.05        | 3.00    | 2.43                 | 28.11             | 22.77             |
| Setting 6     | 5.48        | 9.85  | 4.62        | 3.00    | 1.65                 | 24.60             | 19.68             |

  

| Trial 1 (24h) | Citric acid | NaOCl | Electricity | Modules | Wastewater treatment | Full NaOCl impact | Half NaOCl impact |
|---------------|-------------|-------|-------------|---------|----------------------|-------------------|-------------------|
|               |             |       |             |         |                      | Total             |                   |
| Setting 1     | 12.57       | 22.60 | 6.11        | 2.00    | 2.80                 | 46.08             | 34.78             |
| Setting 2     | 11.01       | 19.79 | 4.33        | 2.00    | 1.88                 | 39.01             | 29.11             |
| Setting 3     | 12.65       | 22.74 | 5.87        | 2.00    | 2.74                 | 45.99             | 34.62             |
| Setting 4     | 10.98       | 19.74 | 4.18        | 2.00    | 1.85                 | 38.75             | 28.88             |
| Setting 5     | 7.95        | 14.30 | 4.87        | 2.00    | 1.97                 | 31.09             | 23.94             |
| Setting 6     | 7.36        | 13.23 | 3.79        | 2.00    | 1.28                 | 27.66             | 21.04             |
| Setting 7     | 7.82        | 14.05 | 4.64        | 2.00    | 1.86                 | 30.37             | 23.34             |
| Setting 8     | 7.13        | 12.81 | 3.63        | 2.00    | 1.20                 | 26.77             | 20.37             |

  

| Trial 2 (24h) | Citric acid | NaOCl | Electricity | Modules | Wastewater treatment | Full NaOCl impact | Half NaOCl impact |
|---------------|-------------|-------|-------------|---------|----------------------|-------------------|-------------------|
|               |             |       |             |         |                      | Total             |                   |
| Setting 1     | 13.58       | 24.41 | 6.84        | 3.00    | 2.96                 | 50.79             | 38.58             |
| Setting 2     | 11.66       | 20.96 | 4.80        | 3.00    | 1.94                 | 42.36             | 31.88             |
| Setting 3     | 13.50       | 24.28 | 6.55        | 3.00    | 2.95                 | 50.28             | 38.14             |
| Setting 4     | 11.77       | 21.16 | 4.68        | 3.00    | 1.95                 | 42.56             | 31.98             |
| Setting 5     | 10.15       | 18.25 | 5.96        | 3.00    | 2.39                 | 39.76             | 30.63             |
| Setting 6     | 9.32        | 16.76 | 4.56        | 3.00    | 1.61                 | 35.24             | 26.87             |
